# Supplementary material for: Diagnostic and predictive accuracy of the Clinical Frailty Scale among hospitalised older medical patients: a systematic review and meta-analysis protocol
Source: HighWire-hosted journal article supplement (doi:10.1136/bmjopen-2020-040765), 2021-01-01
Supplement: bmjopen-2020-040765supp001_data_supplement.pdf [file bmjopen-2020-040765supp001_data_supplement.pdf]

**Supplementary File 1: Search strategy MEDLINE Pubmed**

Limits: Title/Abstract

Dates: 01/01/2005 – present

Date of search: 30<sup>th</sup> October 2019

- #1 Clinical Frailty Scale
- #2 Rockwood Clinical Frailty Scale
- #3 CFS
- #4 (#1 OR #2 OR #3)
- #5 older adult
- #6 elderly
- #7 geriatric
- #8 aged
- #9 aging
- #10 older person
- #11 aged 65
- #12 senior
- #13 retired
- #14 65+
- #15 (#5 OR #6 OR #7 #8 OR #9 OR #10 #11 OR #12 OR #13 OR #14)
- #16 #4 AND #15
