# Supplementary material for: Diagnostic and predictive accuracy of the Clinical Frailty Scale among hospitalised older medical patients: a systematic review and meta-analysis protocol
Source: HighWire-hosted journal article supplement (doi:10.1136/bmjopen-2020-040765), 2021-01-01
Supplement: bmjopen-2020-040765supp002_data_supplement.pdf [file bmjopen-2020-040765supp002_data_supplement.pdf]

**Characteristics of studies included in the review**

| <b>Study &amp; setting</b> | <b>Patient: n, sex, mean age</b> | <b>Patient selection</b> | <b>Patient group</b> | <b>Tool and details of administration</b> | <b>Time to follow-up</b> | <b>Outcome: definition, n (%), data source</b> |
|----------------------------|----------------------------------|--------------------------|----------------------|-------------------------------------------|--------------------------|------------------------------------------------|
|                            |                                  |                          |                      |                                           |                          |                                                |
